# Supplementary material for: Application of Grey Relational Analysis to Predict Dementia Tendency by Cognitive Function, Sleep Disturbances, and Health Conditions of Diabetic Patients
Source: MDPI journal article supplement (doi:10.3390/brainsci12121642), 2022-11-30
Supplement: s1 [file s1]

**Table S1. (supplemental data).** Grey relational coefficient (GRC) ( $n = 220$ )

| No | BMI    | HbA <sub>1</sub> C | Sugar  | TCholesterol | HDL_C  | LDL_C  | TG     | SQ     | MMSE   | TGDS   | PQOL   | MQOL   |
|----|--------|--------------------|--------|--------------|--------|--------|--------|--------|--------|--------|--------|--------|
| 1  | 0.8487 | 0.7562             | 0.4078 | 0.6774       | 0.8678 | 0.8582 | 0.3958 | 0.7500 | 0.3333 | 0.5714 | 0.7168 | 0.8410 |
| 2  | 0.8007 | 0.7888             | 0.4100 | 0.6752       | 1.0000 | 0.8269 | 0.3967 | 0.8571 | 0.3333 | 0.5714 | 0.7297 | 0.8204 |
| 3  | 0.7710 | 0.7439             | 0.3968 | 0.6563       | 0.8235 | 0.7691 | 0.3812 | 0.8571 | 0.3333 | 0.5455 | 0.8571 | 0.8204 |
| 4  | 0.8059 | 0.7349             | 0.3904 | 0.7000       | 0.8468 | 0.8602 | 0.3964 | 0.8780 | 0.3750 | 0.5714 | 0.7980 | 0.8375 |
| 5  | 0.8225 | 0.7593             | 0.4078 | 0.6961       | 0.8077 | 0.8383 | 0.4061 | 0.7500 | 0.3462 | 0.5455 | 0.9153 | 0.8590 |
| 6  | 0.8417 | 0.7531             | 0.4083 | 0.6695       | 0.8077 | 0.8213 | 0.3719 | 0.7500 | 0.3333 | 0.5217 | 0.6694 | 0.7672 |
| 7  | 0.8487 | 0.7469             | 0.3978 | 0.6429       | 0.8077 | 0.7469 | 0.3729 | 0.7347 | 0.5294 | 0.5000 | 0.7465 | 0.7791 |
| 8  | 0.8259 | 0.7500             | 0.4050 | 0.6535       | 0.7895 | 0.7691 | 0.3853 | 0.7826 | 0.3600 | 0.6667 | 0.9364 | 0.8306 |
| 9  | 0.8183 | 0.8170             | 0.4027 | 0.6760       | 0.7216 | 0.7823 | 0.5052 | 0.7660 | 0.6923 | 0.4800 | 0.7826 | 0.7731 |
| 10 | 0.7952 | 0.7787             | 0.3962 | 0.6774       | 0.7636 | 0.8326 | 0.3825 | 0.9474 | 0.4286 | 0.7500 | 0.8182 | 0.8973 |
| 11 | 0.8431 | 0.7689             | 0.3984 | 0.7175       | 0.8714 | 0.8194 | 0.3904 | 0.7660 | 0.3333 | 0.5217 | 0.7714 | 0.7791 |
| 12 | 0.8067 | 0.9385             | 0.7500 | 0.6468       | 0.7343 | 0.7658 | 0.4108 | 0.7826 | 0.3913 | 0.5714 | 0.7431 | 0.8204 |
| 13 | 0.8635 | 0.7722             | 0.4089 | 0.5855       | 0.7895 | 0.7658 | 0.3742 | 0.8780 | 0.4286 | 0.5455 | 0.8482 | 0.7913 |
| 14 | 0.8688 | 0.8281             | 0.4796 | 0.6597       | 0.7609 | 0.7891 | 0.4114 | 0.7200 | 0.3750 | 0.4800 | 0.7980 | 0.7821 |
| 15 | 0.7744 | 0.7531             | 0.4100 | 0.6618       | 0.7807 | 0.8031 | 0.3839 | 0.7200 | 0.4286 | 0.5000 | 0.6612 | 0.7761 |
| 16 | 0.8170 | 0.8841             | 0.5241 | 0.6870       | 0.8642 | 0.8501 | 0.3653 | 0.7826 | 0.3333 | 0.5217 | 0.6835 | 0.7882 |
| 17 | 0.8571 | 0.8592             | 0.4719 | 0.6796       | 0.7865 | 0.8521 | 0.3844 | 0.8780 | 0.3600 | 0.6000 | 0.8617 | 0.8105 |
| 18 | 0.8410 | 0.7531             | 0.3968 | 0.6488       | 0.7394 | 0.7908 | 0.3847 | 0.7660 | 0.3462 | 0.4800 | 0.7043 | 0.7913 |
| 19 | 0.8343 | 1.0000             | 0.4637 | 0.6468       | 0.7554 | 0.7674 | 0.3839 | 0.7200 | 0.3600 | 0.4800 | 0.7105 | 0.7882 |
| 20 | 0.8217 | 0.7787             | 0.3838 | 0.6402       | 0.7527 | 0.7578 | 0.3825 | 0.7059 | 0.4286 | 0.5000 | 0.7200 | 0.7913 |
| 21 | 0.7827 | 0.7821             | 0.3858 | 0.6590       | 0.8203 | 0.8176 | 0.3615 | 0.8571 | 0.3750 | 0.5455 | 0.7535 | 0.7913 |
| 22 | 0.8585 | 0.7531             | 0.4112 | 0.6840       | 0.7500 | 0.8832 | 0.3886 | 0.7500 | 0.3913 | 0.5000 | 0.7043 | 0.7821 |

| No | BMI    | HbA <sub>1</sub> C | Sugar  | TCholesterol | HDL_C  | LDL_C  | TG     | SQ     | MMSE   | TGDS   | PQOL   | MQOL   |
|----|--------|--------------------|--------|--------------|--------|--------|--------|--------|--------|--------|--------|--------|
| 23 | 0.7662 | 0.7625             | 0.3952 | 0.6604       | 0.8203 | 0.7840 | 0.3688 | 0.8372 | 0.3462 | 0.5000 | 0.7200 | 0.7913 |
| 24 | 0.8497 | 0.7657             | 0.4509 | 0.6442       | 0.7609 | 0.7756 | 0.3833 | 0.7347 | 0.3913 | 0.8000 | 0.7902 | 0.9054 |
| 25 | 0.8927 | 0.8133             | 0.4242 | 0.6189       | 0.7554 | 0.8326 | 0.3985 | 0.7500 | 0.3462 | 0.5455 | 0.6807 | 0.7791 |
| 26 | 0.8420 | 0.7787             | 0.4182 | 0.6448       | 0.7394 | 0.7626 | 0.4143 | 0.7660 | 0.4737 | 0.6000 | 0.8351 | 0.8008 |
| 27 | 0.8126 | 0.7625             | 0.3915 | 0.6402       | 0.7554 | 0.7363 | 0.3747 | 0.8571 | 0.3462 | 0.5217 | 0.6894 | 0.7976 |
| 28 | 0.8519 | 0.7593             | 0.3946 | 0.7159       | 0.7778 | 0.8963 | 0.4086 | 0.7826 | 0.3333 | 0.6000 | 0.7500 | 0.9136 |
| 29 | 0.8576 | 0.8206             | 0.4078 | 0.6442       | 0.7266 | 0.7806 | 0.4006 | 0.7347 | 0.3750 | 0.5217 | 0.6835 | 0.7882 |
| 30 | 0.7972 | 0.7657             | 0.4016 | 0.6811       | 0.7664 | 0.8085 | 0.4136 | 0.7500 | 0.3462 | 0.5000 | 0.9474 | 0.8040 |
| 31 | 0.8077 | 0.8318             | 0.3925 | 0.6667       | 0.7749 | 0.7891 | 0.3747 | 0.7200 | 0.3462 | 0.5714 | 0.6864 | 0.7945 |
| 32 | 0.8132 | 0.8927             | 0.4434 | 0.6522       | 0.7985 | 0.7707 | 0.3867 | 0.8372 | 0.4091 | 0.5217 | 0.6835 | 0.7761 |
| 33 | 0.9294 | 0.7854             | 0.4200 | 1.0000       | 0.7343 | 0.8602 | 0.4055 | 0.8000 | 0.3333 | 0.5217 | 0.8617 | 0.7945 |
| 34 | 0.8257 | 0.7657             | 0.4044 | 0.6870       | 0.8607 | 0.8326 | 0.3742 | 0.7500 | 0.4286 | 0.7059 | 0.8020 | 0.9136 |
| 35 | 0.8514 | 0.7922             | 0.4095 | 0.6576       | 0.7865 | 0.8013 | 0.3693 | 0.7500 | 0.3462 | 0.4800 | 0.6694 | 0.7882 |
| 36 | 0.8717 | 0.7787             | 0.4336 | 0.6984       | 0.8108 | 0.6823 | 0.4421 | 0.8000 | 0.4500 | 0.5455 | 0.7364 | 0.7913 |
| 37 | 0.7832 | 0.7754             | 0.4112 | 0.6969       | 0.8607 | 0.8602 | 0.3630 | 0.7059 | 0.5625 | 0.5000 | 0.6750 | 0.7821 |
| 38 | 0.7883 | 0.7722             | 0.3978 | 0.6563       | 0.7598 | 0.8172 | 0.4055 | 0.7200 | 0.3333 | 0.5217 | 0.8710 | 0.8072 |
| 39 | 0.9176 | 0.7854             | 0.4095 | 0.6569       | 0.7778 | 0.7658 | 0.4079 | 0.7500 | 0.3333 | 0.5000 | 0.7043 | 0.7882 |
| 40 | 0.9399 | 0.7754             | 0.4170 | 0.6984       | 0.7778 | 0.8919 | 0.3988 | 0.7500 | 0.3600 | 0.5455 | 0.8571 | 0.7791 |
| 41 | 0.8680 | 0.8097             | 0.4317 | 0.7464       | 0.7749 | 0.7485 | 0.4146 | 0.6923 | 0.3333 | 0.5217 | 0.7043 | 0.7852 |
| 42 | 0.8643 | 0.7320             | 0.4011 | 0.6462       | 0.7368 | 0.7891 | 0.3777 | 0.7500 | 0.3333 | 0.4800 | 0.6807 | 0.7852 |
| 43 | 0.7960 | 0.7409             | 0.3925 | 0.6522       | 0.7778 | 0.7840 | 0.3761 | 0.7826 | 0.3333 | 1.0000 | 0.9101 | 0.9306 |
| 44 | 0.8468 | 0.7562             | 0.4106 | 0.6789       | 0.7636 | 0.8213 | 0.4172 | 0.7059 | 0.3600 | 0.5000 | 0.7043 | 0.7821 |

| No | BMI    | HbA <sub>1</sub> C | Sugar  | TCholesterol | HDL_C  | LDL_C  | TG     | SQ     | MMSE   | TGDS   | PQOL   | MQOL   |
|----|--------|--------------------|--------|--------------|--------|--------|--------|--------|--------|--------|--------|--------|
| 45 | 0.8103 | 0.7409             | 0.4061 | 0.7127       | 0.8171 | 0.9190 | 0.3779 | 0.7347 | 0.3462 | 0.5217 | 0.6807 | 0.7945 |
| 46 | 0.8093 | 0.7409             | 0.3915 | 0.6225       | 0.7749 | 0.7132 | 0.3680 | 0.8000 | 0.6000 | 0.5000 | 0.6585 | 0.7701 |
| 47 | 0.8408 | 0.7439             | 0.3952 | 0.6855       | 0.8367 | 0.8213 | 0.3673 | 0.7347 | 0.3462 | 0.5000 | 0.6694 | 0.7761 |
| 48 | 0.8799 | 0.7439             | 0.4078 | 0.6576       | 0.7636 | 0.8049 | 0.3732 | 0.7200 | 0.3750 | 0.4800 | 0.7168 | 0.7852 |
| 49 | 0.7964 | 0.7409             | 0.4123 | 0.6818       | 0.7473 | 0.8176 | 0.4443 | 0.7826 | 0.3333 | 0.5455 | 0.7431 | 0.7913 |
| 50 | 0.7938 | 0.8927             | 0.6563 | 0.7412       | 0.7292 | 0.8789 | 0.5785 | 0.7826 | 0.3333 | 0.5000 | 0.7137 | 0.7882 |
| 51 | 0.8445 | 0.7821             | 0.4343 | 0.6481       | 0.7527 | 0.7823 | 0.3665 | 0.8182 | 0.3462 | 0.5714 | 0.7074 | 0.8238 |
| 52 | 0.8646 | 0.7625             | 0.4158 | 0.6604       | 0.8077 | 0.7823 | 0.3795 | 0.7660 | 0.3333 | 0.5217 | 0.6835 | 0.7945 |
| 53 | 0.8355 | 0.7500             | 0.3952 | 0.6863       | 0.7836 | 0.8663 | 0.3742 | 0.6923 | 0.6923 | 0.5455 | 0.7465 | 0.7791 |
| 54 | 0.8134 | 0.8356             | 0.4249 | 0.6502       | 0.7609 | 0.7773 | 0.3833 | 0.7500 | 0.3333 | 0.4800 | 0.6864 | 0.7556 |
| 55 | 0.8422 | 0.7689             | 0.4200 | 0.6938       | 0.8300 | 0.8541 | 0.3758 | 0.8182 | 0.3462 | 0.8571 | 0.8100 | 0.8701 |
| 56 | 0.8210 | 0.7500             | 0.4055 | 0.6863       | 0.8203 | 0.8462 | 0.3825 | 0.8780 | 0.3333 | 0.7500 | 0.7941 | 0.8627 |
| 57 | 0.9409 | 0.7439             | 0.4055 | 0.6549       | 0.8502 | 0.7578 | 0.3670 | 0.8571 | 0.3333 | 0.5455 | 0.7297 | 0.7945 |
| 58 | 0.8716 | 0.7531             | 0.4118 | 0.6442       | 0.7554 | 0.7547 | 0.4083 | 0.8571 | 0.3333 | 0.5217 | 0.7265 | 0.8105 |
| 59 | 0.8308 | 0.7722             | 0.3952 | 0.6597       | 0.7554 | 0.7978 | 0.3909 | 0.8182 | 0.3333 | 0.8000 | 0.8223 | 0.8894 |
| 60 | 0.8330 | 0.7821             | 0.4261 | 0.6961       | 0.8046 | 0.8643 | 0.4146 | 0.7660 | 0.3333 | 0.5217 | 0.6694 | 0.7976 |
| 61 | 0.8191 | 0.8592             | 0.4949 | 0.6377       | 0.7447 | 0.7363 | 0.4279 | 0.8000 | 0.3333 | 0.5000 | 0.6894 | 0.7882 |
| 62 | 0.7992 | 0.7379             | 0.3899 | 0.6351       | 0.7500 | 0.7531 | 0.3721 | 0.7347 | 0.3913 | 0.5455 | 0.6807 | 0.7761 |
| 63 | 0.8141 | 0.7888             | 0.4089 | 0.7159       | 0.7554 | 0.8231 | 0.4755 | 0.7347 | 0.3750 | 0.5000 | 0.6694 | 0.7791 |
| 64 | 0.8273 | 0.7439             | 0.3889 | 0.6528       | 0.8861 | 0.7319 | 0.3630 | 0.8571 | 0.3600 | 0.5217 | 0.7168 | 0.7731 |
| 65 | 0.7944 | 0.7409             | 0.4011 | 0.6716       | 0.7500 | 0.7891 | 0.4272 | 0.6923 | 0.5294 | 0.5000 | 0.7013 | 0.7731 |
| 66 | 0.8443 | 0.7500             | 0.4100 | 0.7683       | 0.7447 | 0.8250 | 0.9745 | 0.7347 | 0.3333 | 0.5000 | 0.6983 | 0.7672 |

| No | BMI    | HbA <sub>1</sub> C | Sugar  | TCholesterol | HDL_C  | LDL_C  | TG     | SQ     | MMSE   | TGDS   | PQOL   | MQOL   |
|----|--------|--------------------|--------|--------------|--------|--------|--------|--------|--------|--------|--------|--------|
| 67 | 0.8435 | 0.7531             | 0.4100 | 0.6716       | 0.7955 | 0.8288 | 0.3825 | 0.7059 | 0.3462 | 0.5217 | 0.6864 | 0.7761 |
| 68 | 0.8043 | 0.7625             | 0.4158 | 0.6583       | 0.7636 | 0.7961 | 0.3895 | 0.7826 | 0.3462 | 0.5455 | 0.7330 | 0.7731 |
| 69 | 0.7710 | 0.7593             | 0.4123 | 0.6908       | 0.8015 | 0.8602 | 0.3850 | 0.8372 | 0.3333 | 0.5455 | 0.7980 | 0.8105 |
| 70 | 0.8107 | 0.7922             | 0.4033 | 0.6502       | 0.7664 | 0.7723 | 0.3875 | 0.7826 | 0.4091 | 0.5000 | 0.6667 | 0.7761 |
| 71 | 0.8190 | 0.7469             | 0.4044 | 0.6855       | 0.7985 | 0.8602 | 0.3698 | 0.7347 | 0.3462 | 0.4800 | 0.6694 | 0.7731 |
| 72 | 0.8298 | 0.7531             | 0.4044 | 0.6833       | 0.7581 | 0.8622 | 0.4006 | 0.7660 | 0.4091 | 0.5455 | 0.7137 | 0.7791 |
| 73 | 0.8009 | 0.7821             | 0.4292 | 0.6357       | 0.7447 | 0.7516 | 0.4000 | 0.7826 | 0.3333 | 0.5000 | 0.6532 | 0.7701 |
| 74 | 0.7754 | 0.7409             | 0.3904 | 0.6818       | 0.8300 | 0.8213 | 0.3737 | 0.7347 | 0.3600 | 0.5000 | 0.6722 | 0.7701 |
| 75 | 0.7892 | 0.7562             | 0.3915 | 0.6840       | 0.7985 | 0.8176 | 0.3861 | 0.6923 | 0.7500 | 0.5455 | 0.7297 | 0.7852 |
| 76 | 0.8181 | 0.8206             | 0.3858 | 0.6840       | 0.7925 | 0.8250 | 0.4623 | 0.7059 | 0.4091 | 0.5217 | 0.6807 | 0.7791 |
| 77 | 0.8699 | 0.7821             | 0.4330 | 0.6300       | 0.7527 | 0.7469 | 0.3895 | 0.7347 | 0.3600 | 0.5000 | 0.6953 | 0.7761 |
| 78 | 0.8569 | 0.7722             | 0.4273 | 0.6468       | 0.7368 | 0.7823 | 0.3915 | 0.9474 | 0.3750 | 0.5217 | 0.7751 | 0.7976 |
| 79 | 0.8881 | 0.7469             | 0.3915 | 0.6535       | 0.8015 | 0.7531 | 0.3872 | 0.7500 | 0.3913 | 0.5000 | 0.7714 | 0.7913 |
| 80 | 0.8780 | 0.7469             | 0.3995 | 0.6900       | 0.7807 | 0.8139 | 0.4152 | 0.7500 | 0.3600 | 0.5217 | 0.7105 | 0.7852 |
| 81 | 0.8117 | 0.7593             | 0.3995 | 0.6306       | 0.7420 | 0.7423 | 0.3803 | 0.6923 | 0.3600 | 0.5000 | 0.6694 | 0.7731 |
| 82 | 0.8399 | 0.7689             | 0.4224 | 0.6632       | 0.7420 | 0.7943 | 0.4061 | 0.7200 | 0.4500 | 0.5000 | 0.6667 | 0.7731 |
| 83 | 0.8035 | 0.8281             | 0.3904 | 0.6646       | 0.7955 | 0.7978 | 0.3787 | 0.7660 | 0.5294 | 0.5714 | 0.6983 | 0.7913 |
| 84 | 0.7971 | 0.8433             | 0.4925 | 0.6767       | 0.8077 | 0.8013 | 0.3970 | 0.7200 | 0.3333 | 0.5455 | 0.6835 | 0.7701 |
| 85 | 1.0000 | 0.9015             | 0.4788 | 0.6818       | 0.7581 | 0.8231 | 0.3785 | 0.8372 | 0.3600 | 0.5000 | 0.7232 | 0.7701 |
| 86 | 0.8913 | 0.7291             | 0.3930 | 0.6674       | 0.8678 | 0.7691 | 0.3779 | 0.7500 | 0.4091 | 0.4800 | 0.7714 | 0.7761 |
| 87 | 0.8127 | 0.7657             | 0.4135 | 0.6488       | 0.7664 | 0.7874 | 0.3660 | 0.7826 | 0.4286 | 0.5217 | 0.8223 | 0.7976 |
| 88 | 0.8183 | 0.7531             | 0.4362 | 0.7554       | 0.7368 | 1.0000 | 0.4648 | 0.7500 | 0.4286 | 0.5455 | 0.6894 | 0.7913 |

| No  | BMI    | HbA <sub>1</sub> C | Sugar  | TCholesterol | HDL_C  | LDL_C  | TG     | SQ     | MMSE   | TGDS   | PQOL   | MQOL   |
|-----|--------|--------------------|--------|--------------|--------|--------|--------|--------|--------|--------|--------|--------|
| 89  | 0.8576 | 0.7500             | 0.4011 | 0.6646       | 0.7865 | 0.7840 | 0.3944 | 0.7347 | 0.3333 | 0.5000 | 0.6864 | 0.7945 |
| 90  | 0.8330 | 0.8026             | 0.3989 | 0.6231       | 0.7317 | 0.7363 | 0.3777 | 0.7347 | 0.3333 | 0.5000 | 0.6983 | 0.7791 |
| 91  | 0.8059 | 0.7439             | 0.4078 | 0.6468       | 0.8077 | 0.7610 | 0.3678 | 0.7347 | 0.4091 | 0.5455 | 0.6835 | 0.7761 |
| 92  | 0.8754 | 0.7500             | 0.3925 | 0.6618       | 0.7500 | 0.7996 | 0.4012 | 0.7660 | 0.3333 | 0.5217 | 0.6667 | 0.7821 |
| 93  | 0.7817 | 0.8133             | 0.4170 | 0.6681       | 0.7985 | 0.7806 | 0.3643 | 0.7059 | 0.4737 | 0.5217 | 0.6835 | 0.7731 |
| 94  | 0.7988 | 0.7722             | 0.3978 | 0.6535       | 0.8171 | 0.7594 | 0.3878 | 0.8182 | 0.5294 | 0.5455 | 0.6894 | 0.7791 |
| 95  | 0.8787 | 0.8632             | 0.4421 | 0.6549       | 0.7865 | 0.7363 | 0.4395 | 0.7826 | 0.3600 | 0.5000 | 0.7043 | 0.7643 |
| 96  | 0.8605 | 0.7593             | 0.4141 | 0.6667       | 0.7636 | 0.8383 | 0.3698 | 0.7347 | 0.4286 | 0.5000 | 0.6750 | 0.7791 |
| 97  | 0.9075 | 0.8026             | 0.4249 | 0.6604       | 0.7581 | 0.8031 | 0.3870 | 0.8571 | 0.4286 | 0.6000 | 0.7397 | 0.7913 |
| 98  | 0.8919 | 0.8318             | 0.4279 | 0.6468       | 0.7836 | 0.7642 | 0.3753 | 0.8000 | 0.3333 | 0.6316 | 0.7642 | 0.7821 |
| 99  | 0.8335 | 0.7379             | 0.3910 | 0.6667       | 0.7778 | 0.8176 | 0.3693 | 0.8182 | 0.3913 | 0.5455 | 0.6694 | 0.7976 |
| 100 | 0.8165 | 0.7262             | 0.3843 | 0.6731       | 0.8642 | 0.7908 | 0.3719 | 0.8182 | 0.3333 | 0.5217 | 0.6694 | 0.8627 |
| 101 | 0.8411 | 0.7754             | 0.4000 | 0.6455       | 0.7554 | 0.7348 | 0.4356 | 0.8000 | 1.0000 | 0.8571 | 0.8141 | 0.9901 |
| 102 | 0.8175 | 0.7176             | 0.3910 | 0.6583       | 0.7836 | 0.8049 | 0.3630 | 0.8372 | 0.4286 | 0.5217 | 0.6983 | 0.7528 |
| 103 | 0.8092 | 0.7821             | 0.3707 | 0.6984       | 0.8434 | 0.8501 | 0.3793 | 0.7660 | 0.3600 | 0.5217 | 0.6983 | 0.7945 |
| 104 | 0.8017 | 0.7821             | 0.3957 | 0.6724       | 0.8108 | 0.8176 | 0.3716 | 0.8571 | 0.3333 | 0.5217 | 0.8663 | 0.9178 |
| 105 | 0.8499 | 0.7562             | 0.4011 | 0.6535       | 0.7865 | 0.7790 | 0.3761 | 0.8000 | 0.3600 | 0.5217 | 0.7137 | 0.8701 |
| 106 | 0.7972 | 0.7349             | 0.4158 | 0.6402       | 0.8015 | 0.7319 | 0.3742 | 0.8780 | 0.3462 | 0.5217 | 0.7074 | 0.7731 |
| 107 | 0.7910 | 0.7625             | 0.4170 | 0.6488       | 0.7925 | 0.7691 | 0.3688 | 0.9474 | 0.3600 | 0.6000 | 0.6953 | 0.8340 |
| 108 | 0.8028 | 0.7854             | 0.4027 | 0.6597       | 0.7749 | 0.7790 | 0.3847 | 0.7826 | 0.3600 | 0.5455 | 0.6894 | 0.7882 |
| 109 | 0.8016 | 0.7593             | 0.3889 | 0.6724       | 0.7447 | 0.8288 | 0.3929 | 0.8000 | 0.4737 | 0.5714 | 0.7570 | 0.8445 |
| 110 | 0.7781 | 0.7379             | 0.3813 | 0.6709       | 0.7266 | 0.8326 | 0.3803 | 0.7826 | 0.3600 | 0.5714 | 0.8394 | 0.9136 |

| No  | BMI    | HbA <sub>1</sub> C | Sugar  | TCholesterol | HDL_C  | LDL_C  | TG     | SQ     | MMSE   | TGDS   | PQOL   | MQOL   |
|-----|--------|--------------------|--------|--------------|--------|--------|--------|--------|--------|--------|--------|--------|
| 111 | 0.8526 | 0.7625             | 0.4382 | 0.6435       | 0.7554 | 0.7840 | 0.4668 | 0.8000 | 0.3333 | 0.6000 | 0.8757 | 0.9526 |
| 112 | 0.8672 | 0.7379             | 0.3863 | 0.6688       | 0.7500 | 0.8213 | 0.4245 | 0.7826 | 0.3600 | 0.5455 | 0.8020 | 0.8816 |
| 113 | 0.8321 | 0.7689             | 0.4230 | 0.6287       | 0.7527 | 0.7289 | 0.3973 | 0.7200 | 0.3600 | 0.5000 | 0.7751 | 0.7761 |
| 114 | 0.8190 | 0.7854             | 0.3978 | 0.6364       | 0.7581 | 0.7363 | 0.4045 | 0.9231 | 0.3600 | 0.5714 | 0.6894 | 0.8040 |
| 115 | 0.9086 | 0.7593             | 0.4100 | 0.6549       | 0.7447 | 0.7926 | 0.3878 | 0.8000 | 0.3600 | 0.6000 | 1.0000 | 0.9349 |
| 116 | 0.8304 | 0.8097             | 0.4421 | 0.6833       | 0.7955 | 0.8541 | 0.3753 | 0.7059 | 0.3333 | 0.5217 | 0.6750 | 0.7821 |
| 117 | 0.8687 | 0.7349             | 0.4044 | 0.6604       | 0.7955 | 0.7874 | 0.3878 | 0.7500 | 0.3462 | 0.5217 | 0.6667 | 0.7913 |
| 118 | 0.7772 | 0.7320             | 0.3838 | 0.6760       | 0.8268 | 0.8345 | 0.3761 | 0.7059 | 0.5000 | 0.5455 | 0.6953 | 0.7731 |
| 119 | 0.8096 | 0.8472             | 0.4667 | 0.6660       | 0.8537 | 0.7707 | 0.3872 | 0.6923 | 0.3600 | 0.5455 | 0.6585 | 0.7672 |
| 120 | 0.8148 | 0.7754             | 0.4066 | 0.6515       | 0.8046 | 0.7516 | 0.3630 | 0.8000 | 0.3600 | 0.5455 | 0.6953 | 0.7913 |
| 121 | 0.8086 | 0.8026             | 0.4038 | 0.6219       | 0.7749 | 0.7188 | 0.3615 | 0.7200 | 0.3462 | 0.5217 | 0.6778 | 0.7761 |
| 122 | 0.8569 | 0.7291             | 0.3936 | 0.6660       | 0.7664 | 0.7978 | 0.3898 | 0.7500 | 0.3750 | 0.4800 | 0.6778 | 0.7731 |
| 123 | 0.8147 | 0.7500             | 0.3989 | 0.6409       | 0.7343 | 0.7348 | 0.3690 | 0.7200 | 0.3913 | 0.5217 | 0.7043 | 0.7643 |
| 124 | 0.8101 | 0.7689             | 0.4147 | 0.6885       | 0.7554 | 0.7978 | 0.3997 | 0.8780 | 0.4737 | 0.8000 | 0.9205 | 0.9663 |
| 125 | 0.8706 | 0.7722             | 0.4388 | 0.6409       | 0.7664 | 0.7610 | 0.3926 | 0.8182 | 0.3333 | 0.5000 | 0.8351 | 0.7913 |
| 126 | 0.8378 | 0.7148             | 0.4066 | 0.6674       | 0.7721 | 0.8176 | 0.3719 | 0.7500 | 0.3333 | 0.5000 | 0.6694 | 0.7731 |
| 127 | 0.9456 | 0.7409             | 0.3946 | 0.6448       | 0.7581 | 0.7740 | 0.3842 | 0.8571 | 0.4737 | 0.5217 | 0.6750 | 0.7945 |
| 128 | 0.8173 | 0.7500             | 0.4005 | 0.6803       | 0.8367 | 0.8326 | 0.3675 | 0.7347 | 0.3462 | 0.5000 | 0.6585 | 0.7643 |
| 129 | 0.7975 | 0.7469             | 0.3978 | 0.6542       | 0.8300 | 0.7642 | 0.3633 | 0.8182 | 0.3913 | 0.5000 | 0.6953 | 0.7791 |
| 130 | 0.8185 | 0.7888             | 0.3930 | 0.6931       | 0.8046 | 0.7806 | 0.3964 | 0.8182 | 0.3462 | 0.5000 | 0.7941 | 0.7945 |
| 131 | 0.9233 | 0.8433             | 0.4153 | 0.6275       | 0.7807 | 0.7304 | 0.3719 | 0.7660 | 0.3600 | 0.5714 | 0.7902 | 0.8816 |
| 132 | 0.8320 | 0.7531             | 0.3904 | 0.6422       | 0.7721 | 0.7658 | 0.3693 | 0.8182 | 0.6000 | 0.5217 | 0.7826 | 0.8171 |

| No  | BMI    | HbA <sub>1</sub> C | Sugar  | TCholesterol | HDL_C  | LDL_C  | TG     | SQ     | MMSE   | TGDS   | PQOL   | MQOL   |
|-----|--------|--------------------|--------|--------------|--------|--------|--------|--------|--------|--------|--------|--------|
| 133 | 0.8000 | 0.7722             | 0.4095 | 0.6495       | 0.7317 | 0.7926 | 0.3806 | 0.7500 | 0.3750 | 0.5000 | 0.7397 | 0.7701 |
| 134 | 0.8412 | 0.8318             | 0.4212 | 0.6522       | 0.7836 | 0.7691 | 0.3961 | 0.7500 | 0.3333 | 0.5000 | 0.6667 | 0.7672 |
| 135 | 0.8095 | 0.7320             | 0.3904 | 0.6294       | 0.7420 | 0.7454 | 0.3782 | 0.8000 | 0.3462 | 0.4800 | 0.7105 | 0.7672 |
| 136 | 0.7630 | 0.8472             | 0.3750 | 0.6625       | 0.7368 | 0.7996 | 0.3964 | 0.9000 | 0.5294 | 0.5714 | 0.7105 | 0.8105 |
| 137 | 0.7980 | 0.7176             | 0.3973 | 0.6000       | 0.7609 | 0.7874 | 0.3594 | 0.7200 | 0.4737 | 0.5000 | 0.6559 | 0.7672 |
| 138 | 0.7635 | 0.7722             | 0.3989 | 0.6495       | 0.8203 | 0.7626 | 0.3653 | 0.7826 | 0.3333 | 0.5217 | 0.6983 | 0.7672 |
| 139 | 0.8258 | 0.7922             | 0.3858 | 0.6522       | 0.8642 | 0.7531 | 0.3638 | 0.7826 | 0.3333 | 0.5217 | 0.6750 | 0.7945 |
| 140 | 0.8133 | 0.7991             | 0.3952 | 0.6796       | 0.8268 | 0.7840 | 0.3708 | 0.7826 | 0.3462 | 0.5217 | 0.7074 | 0.7791 |
| 141 | 0.8842 | 0.7593             | 0.4022 | 0.6716       | 0.8333 | 0.7740 | 0.3703 | 0.8182 | 0.3600 | 0.5455 | 0.6953 | 0.8072 |
| 142 | 0.8374 | 0.7625             | 0.4349 | 0.6481       | 0.7836 | 0.7674 | 0.3787 | 0.7500 | 0.4737 | 0.6316 | 0.7168 | 0.8340 |
| 143 | 0.8045 | 0.7531             | 0.4044 | 0.6674       | 0.7664 | 0.7857 | 0.4293 | 0.8372 | 0.3462 | 0.5714 | 0.6953 | 0.7791 |
| 144 | 0.8502 | 0.7531             | 0.3863 | 0.6364       | 0.7778 | 0.7500 | 0.3721 | 0.7826 | 0.3333 | 0.4800 | 0.6722 | 0.7761 |
| 145 | 0.9059 | 0.8243             | 0.4368 | 0.6893       | 0.8140 | 0.8705 | 0.3734 | 0.8182 | 0.3913 | 0.5000 | 0.6835 | 0.8040 |
| 146 | 0.8796 | 0.7854             | 0.4182 | 0.6660       | 0.7500 | 0.7891 | 0.4036 | 0.7500 | 0.3462 | 0.5217 | 0.7043 | 0.7643 |
| 147 | 0.8980 | 0.7409             | 0.3925 | 0.6639       | 0.8077 | 0.7926 | 0.3711 | 0.8372 | 0.4500 | 0.5455 | 0.8617 | 0.7791 |
| 148 | 0.8297 | 0.7439             | 0.3899 | 0.6542       | 0.7721 | 0.8013 | 0.3777 | 0.7347 | 0.3750 | 0.4800 | 0.6807 | 0.7791 |
| 149 | 0.7753 | 0.7439             | 0.3936 | 0.6569       | 0.7554 | 0.7961 | 0.3875 | 0.7347 | 0.3333 | 0.5217 | 0.7788 | 0.7528 |
| 150 | 0.8502 | 0.7439             | 0.4129 | 0.6409       | 0.7343 | 0.7806 | 0.3785 | 0.7826 | 0.3462 | 0.5217 | 0.6585 | 0.7791 |
| 151 | 0.8570 | 0.7562             | 0.4016 | 0.6900       | 0.8468 | 0.8541 | 0.3685 | 0.7660 | 0.3462 | 0.5000 | 0.6807 | 0.7701 |
| 152 | 0.7819 | 0.7593             | 0.4078 | 0.6724       | 0.7581 | 0.8422 | 0.3795 | 0.7660 | 0.3462 | 0.5000 | 0.6923 | 0.7585 |
| 153 | 0.7927 | 0.7562             | 0.4038 | 0.6569       | 0.7925 | 0.7806 | 0.3867 | 0.7660 | 0.3333 | 0.5000 | 0.6835 | 0.7643 |
| 154 | 0.8328 | 0.7562             | 0.4236 | 0.6549       | 0.7807 | 0.7485 | 0.3909 | 0.7200 | 0.4500 | 0.5217 | 0.7232 | 0.7672 |

| No  | BMI    | HbA <sub>1</sub> C | Sugar  | TCholesterol | HDL_C  | LDL_C  | TG     | SQ     | MMSE   | TGDS   | PQOL   | MQOL   |
|-----|--------|--------------------|--------|--------------|--------|--------|--------|--------|--------|--------|--------|--------|
| 155 | 0.8610 | 0.9150             | 0.4579 | 0.6796       | 0.7865 | 0.7773 | 0.3844 | 0.8571 | 0.3462 | 0.5217 | 0.7788 | 0.8171 |
| 156 | 0.8243 | 0.8281             | 0.4055 | 0.6442       | 0.7749 | 0.7723 | 0.3693 | 0.8372 | 0.3462 | 0.5000 | 0.6612 | 0.7761 |
| 157 | 0.8777 | 0.8318             | 0.3995 | 0.6495       | 0.7749 | 0.7691 | 0.3739 | 0.8571 | 0.3462 | 0.5000 | 0.7535 | 0.8272 |
| 158 | 0.8737 | 0.8243             | 0.4401 | 0.6840       | 0.8140 | 0.7891 | 0.3703 | 0.8000 | 0.3333 | 0.5000 | 0.7043 | 0.7821 |
| 159 | 0.8091 | 0.7754             | 0.4401 | 0.6256       | 0.7343 | 0.7348 | 0.3861 | 0.7500 | 0.3333 | 0.5000 | 0.7941 | 0.8664 |
| 160 | 0.8120 | 0.8927             | 0.5052 | 0.7464       | 0.7985 | 0.7531 | 0.4341 | 0.7500 | 0.3462 | 0.5455 | 0.6835 | 0.7882 |
| 161 | 0.8153 | 0.7689             | 0.4038 | 0.7031       | 0.8015 | 0.8013 | 0.3921 | 0.8182 | 0.4500 | 0.5217 | 0.6778 | 0.7821 |
| 162 | 0.8008 | 0.8133             | 0.4468 | 0.6745       | 0.7636 | 0.8013 | 0.3856 | 0.7826 | 0.4286 | 0.5217 | 0.8141 | 0.7643 |
| 163 | 0.8393 | 0.7469             | 0.4033 | 0.6674       | 0.8400 | 0.7891 | 0.3785 | 0.7500 | 0.3600 | 0.5217 | 0.7714 | 0.7852 |
| 164 | 0.8789 | 0.7562             | 0.4055 | 0.6716       | 0.8434 | 0.7610 | 0.3645 | 0.7660 | 0.3333 | 0.5217 | 0.6750 | 0.7761 |
| 165 | 0.8212 | 0.7320             | 0.3838 | 0.6893       | 0.8015 | 0.8442 | 0.3822 | 0.8182 | 0.3333 | 0.5000 | 0.6807 | 0.7701 |
| 166 | 0.8169 | 0.7593             | 0.4100 | 0.6306       | 0.7636 | 0.7547 | 0.3623 | 0.7200 | 0.3913 | 0.5217 | 0.6807 | 0.7791 |
| 167 | 0.8169 | 0.7991             | 0.4408 | 0.6597       | 0.7609 | 0.8067 | 0.3761 | 0.7500 | 0.3913 | 0.5000 | 0.6807 | 0.7701 |
| 168 | 0.8860 | 0.7922             | 0.4095 | 0.6170       | 0.7216 | 0.7393 | 0.3648 | 0.8571 | 0.3750 | 0.7059 | 0.8438 | 0.8664 |
| 169 | 0.8353 | 0.7625             | 0.3952 | 0.6306       | 0.8015 | 0.7333 | 0.3668 | 0.7660 | 0.5625 | 0.5455 | 0.7297 | 0.7761 |
| 170 | 0.8469 | 0.8026             | 0.4129 | 0.7258       | 0.7664 | 0.9553 | 0.4248 | 0.6923 | 0.3600 | 0.5455 | 0.6778 | 0.7701 |
| 171 | 0.8585 | 0.7787             | 0.4123 | 0.7127       | 0.7865 | 0.9332 | 0.3915 | 0.7200 | 0.3462 | 0.5217 | 0.6667 | 0.8105 |
| 172 | 0.7975 | 0.7722             | 0.4200 | 0.6495       | 0.8203 | 0.7723 | 0.3678 | 0.7826 | 0.4091 | 0.5455 | 0.6778 | 0.7791 |
| 173 | 0.8798 | 0.8206             | 0.4182 | 0.6442       | 0.7500 | 0.7563 | 0.4130 | 0.7200 | 0.3462 | 0.5000 | 0.6585 | 0.7672 |
| 174 | 0.8052 | 0.7233             | 0.4286 | 0.6415       | 0.7664 | 0.7594 | 0.3904 | 0.7059 | 0.3462 | 0.5000 | 0.8394 | 0.7731 |
| 175 | 0.8602 | 0.7291             | 0.3930 | 0.6415       | 0.7807 | 0.7642 | 0.3793 | 0.7347 | 0.4091 | 0.4800 | 0.7074 | 0.7731 |
| 176 | 0.7867 | 0.8097             | 0.4005 | 0.6448       | 0.8434 | 0.7304 | 0.3719 | 0.7200 | 0.4500 | 0.5217 | 0.6953 | 0.7761 |



| No  | BMI    | HbA <sub>1</sub> C | Sugar  | TCholesterol | HDL_C  | LDL_C  | TG     | SQ     | MMSE   | TGDS   | PQOL   | MQOL   |
|-----|--------|--------------------|--------|--------------|--------|--------|--------|--------|--------|--------|--------|--------|
| 177 | 0.8262 | 0.8356             | 0.4368 | 0.6542       | 0.7721 | 0.7961 | 0.3750 | 0.7200 | 0.3333 | 0.5217 | 0.6953 | 0.7731 |
| 178 | 0.8462 | 0.7379             | 0.4066 | 0.6639       | 0.7368 | 0.8250 | 0.3970 | 0.7059 | 0.3750 | 0.5000 | 0.6585 | 0.7500 |
| 179 | 0.8093 | 0.7821             | 0.3962 | 0.7360       | 0.7292 | 0.7217 | 0.7177 | 0.7500 | 0.3462 | 0.7059 | 0.7980 | 0.7852 |
| 180 | 0.8666 | 0.8206             | 0.3910 | 0.6396       | 0.7985 | 0.7454 | 0.3724 | 0.7826 | 0.3600 | 0.5455 | 0.6835 | 0.8204 |
| 181 | 0.8445 | 0.7722             | 0.4089 | 0.6415       | 0.7807 | 0.7531 | 0.3668 | 0.7500 | 0.3913 | 0.5217 | 0.6667 | 0.7672 |
| 182 | 0.8467 | 0.7349             | 0.4000 | 0.6442       | 0.7581 | 0.7516 | 0.4089 | 0.8780 | 0.4500 | 0.8000 | 0.8617 | 0.9136 |
| 183 | 0.8411 | 0.8756             | 0.6151 | 0.6364       | 0.7527 | 0.7304 | 0.4079 | 0.8372 | 0.3750 | 0.5455 | 0.7500 | 0.7731 |
| 184 | 0.8715 | 0.7562             | 0.4055 | 0.6515       | 0.8235 | 0.7578 | 0.3726 | 0.7500 | 0.3333 | 0.5217 | 0.6807 | 0.7821 |
| 185 | 0.8486 | 0.8394             | 0.4579 | 0.8836       | 0.7581 | 0.8067 | 1.0000 | 0.7826 | 0.3750 | 0.7059 | 0.6983 | 0.8445 |
| 186 | 0.7901 | 0.7262             | 0.3828 | 0.6468       | 0.8571 | 0.7485 | 0.3650 | 0.7200 | 0.4737 | 0.5000 | 0.6835 | 0.7672 |
| 187 | 0.8417 | 0.7821             | 0.3853 | 0.6370       | 0.7581 | 0.7423 | 0.3833 | 0.7660 | 0.3333 | 0.5000 | 0.6864 | 0.7731 |
| 188 | 0.8476 | 0.8243             | 0.4298 | 0.6639       | 0.7778 | 0.7978 | 0.4205 | 0.8571 | 0.3462 | 0.5000 | 0.7535 | 0.8933 |
| 189 | 0.9271 | 0.8133             | 0.4147 | 0.6716       | 0.7836 | 0.8288 | 0.3732 | 0.7200 | 0.3333 | 0.5217 | 0.6953 | 0.7672 |
| 190 | 0.8060 | 0.7957             | 0.4273 | 0.6475       | 0.7292 | 0.7806 | 0.4006 | 0.9231 | 0.3600 | 0.5714 | 0.6953 | 0.7852 |
| 191 | 0.8653 | 0.7262             | 0.3941 | 0.6495       | 0.8140 | 0.7642 | 0.3688 | 0.8571 | 0.3333 | 0.5455 | 0.7570 | 0.7672 |
| 192 | 0.8476 | 0.8394             | 0.4055 | 0.6893       | 0.7836 | 0.8231 | 0.4599 | 0.7347 | 0.3333 | 0.5217 | 0.6983 | 0.7672 |
| 193 | 0.8441 | 0.7320             | 0.3874 | 0.6646       | 0.8607 | 0.7790 | 0.3650 | 0.8000 | 0.3462 | 0.6316 | 0.7465 | 0.8040 |
| 194 | 0.8084 | 0.7469             | 0.3984 | 0.6811       | 0.7985 | 0.8422 | 0.3892 | 0.8372 | 0.3333 | 0.5000 | 0.6983 | 0.7614 |
| 195 | 0.9416 | 0.7531             | 0.4147 | 0.6313       | 0.7692 | 0.7469 | 0.3747 | 0.8372 | 0.3462 | 0.5000 | 0.7265 | 0.7701 |
| 196 | 0.8411 | 0.8133             | 0.5475 | 0.6535       | 0.7865 | 0.7578 | 0.3795 | 0.7500 | 0.3462 | 0.5217 | 0.6559 | 0.7701 |
| 197 | 0.8300 | 0.7349             | 0.3973 | 0.6597       | 0.8434 | 0.7756 | 0.3711 | 0.8780 | 0.3462 | 0.6667 | 0.6585 | 0.7945 |
| 198 | 0.8106 | 0.8133             | 0.4106 | 0.6639       | 0.7985 | 0.8031 | 0.3606 | 0.7347 | 0.3600 | 0.5000 | 0.6694 | 0.7701 |

| No  | BMI    | HbA <sub>1</sub> C | Sugar  | TCholesterol | HDL_C  | LDL_C  | TG     | SQ     | MMSE   | TGDS   | PQOL   | MQOL   |
|-----|--------|--------------------|--------|--------------|--------|--------|--------|--------|--------|--------|--------|--------|
| 199 | 0.8228 | 0.8062             | 0.3936 | 0.6542       | 0.7368 | 0.7756 | 0.4241 | 0.9231 | 0.3913 | 0.7059 | 0.8852 | 1.0000 |
| 200 | 0.8295 | 0.7531             | 0.3984 | 0.6653       | 0.7527 | 0.8194 | 0.3769 | 0.7500 | 0.3462 | 0.5217 | 0.6983 | 0.7731 |
| 201 | 0.8483 | 0.8243             | 0.4147 | 0.6287       | 0.7664 | 0.7289 | 0.3716 | 0.7200 | 0.3333 | 0.5455 | 0.6894 | 0.7731 |
| 202 | 0.8238 | 0.7469             | 0.4129 | 0.6569       | 0.8046 | 0.7723 | 0.3755 | 0.7826 | 0.3462 | 0.5217 | 0.8482 | 0.7672 |
| 203 | 0.8060 | 0.7593             | 0.3973 | 0.6325       | 0.8140 | 0.7578 | 0.3769 | 0.7660 | 0.3600 | 0.5217 | 0.6894 | 0.7701 |
| 204 | 0.8345 | 0.7500             | 0.3984 | 0.5888       | 0.7985 | 0.9404 | 0.3870 | 0.8182 | 0.3333 | 0.4800 | 0.6864 | 0.7821 |
| 205 | 0.7830 | 0.7439             | 0.3962 | 0.6954       | 0.7925 | 0.8919 | 0.3753 | 0.7660 | 0.3600 | 0.5217 | 0.7826 | 0.8481 |
| 206 | 0.8835 | 0.7957             | 0.4551 | 0.6625       | 0.8400 | 0.7857 | 0.3795 | 0.7500 | 0.3333 | 0.5217 | 0.8710 | 0.7701 |
| 207 | 0.8005 | 0.7957             | 0.4176 | 0.6646       | 0.8235 | 0.8013 | 0.3678 | 0.7500 | 0.4091 | 0.5000 | 0.6953 | 0.7821 |
| 208 | 0.8224 | 0.7262             | 0.3848 | 0.7394       | 0.8537 | 0.9213 | 0.4680 | 1.0000 | 0.4500 | 0.8000 | 0.7570 | 0.8445 |
| 209 | 0.7720 | 0.7722             | 1.0000 | 0.6632       | 0.7527 | 0.7610 | 0.4824 | 0.9000 | 0.3333 | 0.6667 | 0.8571 | 0.8072 |
| 210 | 0.7946 | 0.8356             | 0.4544 | 0.6660       | 0.7925 | 0.7485 | 0.3915 | 0.7660 | 0.4091 | 0.5217 | 0.6953 | 0.7761 |
| 211 | 0.8168 | 0.7409             | 0.4530 | 0.6528       | 0.7420 | 0.8013 | 0.4092 | 0.8000 | 0.3333 | 0.6000 | 0.7606 | 0.7882 |
| 212 | 0.7997 | 0.7562             | 0.4011 | 0.6760       | 0.8678 | 0.8213 | 0.3650 | 0.8780 | 0.3462 | 0.5000 | 0.6983 | 0.7821 |
| 213 | 0.8375 | 0.7469             | 0.4044 | 0.6569       | 0.7609 | 0.8085 | 0.3713 | 0.7826 | 0.3462 | 0.5000 | 0.7200 | 0.7731 |
| 214 | 0.7721 | 0.7562             | 0.3973 | 0.6893       | 0.8140 | 0.7439 | 0.3763 | 0.8000 | 0.3462 | 0.5000 | 0.6778 | 0.7791 |
| 215 | 0.8181 | 0.7409             | 0.4055 | 0.6781       | 0.7473 | 0.8941 | 0.3761 | 0.7826 | 0.3600 | 0.5217 | 0.7902 | 0.7791 |
| 216 | 0.7950 | 0.8026             | 0.4530 | 0.6760       | 0.7636 | 0.7469 | 0.3944 | 0.7500 | 0.3462 | 0.4800 | 0.7364 | 0.7945 |
| 217 | 0.8097 | 0.8318             | 0.4089 | 0.6583       | 0.8015 | 0.7943 | 0.3793 | 0.8000 | 0.3462 | 0.5455 | 0.8182 | 0.8138 |
| 218 | 0.9377 | 0.9337             | 0.5131 | 0.6415       | 0.7420 | 0.7943 | 0.3777 | 0.7500 | 0.3333 | 0.5217 | 0.7043 | 0.7821 |
| 219 | 0.8271 | 0.7722             | 0.3962 | 0.7527       | 0.7554 | 0.7485 | 0.3790 | 0.7347 | 0.3462 | 0.5000 | 0.6923 | 0.7701 |
| 220 | 0.8332 | 0.7593             | 0.3823 | 0.6468       | 0.7266 | 0.7260 | 0.4345 | 0.9000 | 0.3333 | 0.6667 | 0.8141 | 0.7731 |

Note. BMI= Body Mass Index; HbA<sub>1</sub>C = Glycated hemoglobin; TCholesterol=Total Cholesterol; HDL\_C = High Density Lipoprotein-Cholesterol ; LDL\_C= Low Density Lipoprotein-Cholesterol; TG= Triglyceride; SQ = Sleep Quality; MMSE= Mini-Mental Status Examination; GDSs= Geriatric Depressive symptoms; PQOL; Physical quality of life; MQOL, Mental quality of lif
